# Supplementary material for: Ectodomain shedding of TβRIII is required for TβRIII-mediated suppression of TGF-β signaling and breast cancer migration and invasion
Source: PubMed Central journal article supplement — Mol Biol Cell. 2014 Aug 15;25(16):2320–32. doi: 10.1091/mbc.E13-09-0524 (PMC4142606; doi:10.1091/mbc.e13-09-0524), 2014-08-15
Supplement: supp_E13-09-0524v1_E13-09-0524SuppFigures.pdf [file supp_E13-09-0524v1_E13-09-0524SuppFigures.pdf]

# Supplemental Materials

*Molecular Biology of the Cell*

Elderbroom et al.

## Supplemental Table 1: Mutagenesis primers for TβRIII NAAIRS mutants

| <i>Mutation:</i> | <i>Location:</i> | <i>Forward Primer Sequence:</i>                   | <i>Reverse Primer Sequence:</i>                   |
|------------------|------------------|---------------------------------------------------|---------------------------------------------------|
| M0               | AA 683-688       | cccgaagctgac aatgctgctatac gatcg cttgtcttcaagc    | gcttgaagacaaaag cgatcgtatagcagcatt gtcagcttgcggg  |
| M1               | AA 689-694       | gataagaagcgattc aatgctgctatac gatcg gcttcaacacc   | ggtgttgaagac cgatcgtatagcagcatt gaatcgcttctatc    |
| M2               | AA 695-700       | gtcttcaagcct aatgctgctatac gatcg ctcttctacag      | ctgtagaagag cgatcgtatagcagcatt aggcttgaagac       |
| M3               | AA 701-706       | caacacctcactg aatgctgctatac gatcg ctgacgctgtgtacg | cgtaacacagcgtcag cgatcgtatagcagcatt cagtgagggtgtg |
| M4               | AA 707-712       | ctacagtgtgag aatgctgctatac gatcg atggagaagcacc    | ggtgcttctccat cgatcgtatagcagcatt ctacactgtag      |
| M5               | AA 713-718       | gctgtgtacgaag aatgctgctatac gatcg aagttgcctaa     | cttaggcaact cgatcgtatagcagcatt cttctacacagc       |
| M6               | AA 719-724       | gaagcaccaccag aatgctgctatac gatcg cctctgacgaagc   | gcttctcaggagg cgatcgtatagcagcatt ctgggggtgcttc    |
| M7               | AA 725-730       | cctaagtgtgtg aatgctgctatac gatcg acctcgtggac      | gtccagcagggt cgatcgtatagcagcatt cacacacttagg      |
| M8               | AA 731-736       | gacgaagcctgc aatgctgctatac gatcg ataactggggc      | ggcccagattat cgatcgtatagcagcatt cgaggctctgc       |
| M9               | AA 737-742       | ctggacgcctcg aatgctgctatac gatcg cagaataagaag     | cttcttattctg cgatcgtatagcagcatt cgaggcgtccag      |
| M10              | AA 743-748       | ctgggccatgatg aatgctgctatac gatcg accaagccccttg   | caaggggcttgg cgatcgtatagcagcatt catcatggcccag     |
| M11              | AA 749-754       | gaagacgttc aatgctgctatac gatcg atccaccatgaagc     | gcttcatggtgat cgatcgtatagcagcatt gaacgtcttc       |
| M12              | AA 755-760       | ccccttctgtg aatgctgctatac gatcg tctaaagaaaaagg    | ctttttctttaga cgatcgtatagcagcatt cacagcaagggg     |
| M13*             | AA 761-766       | * Made by Mutagenex                               |                                                   |
| M14              | AA 767-772       | gaaaaaggcca aatgctgctatac gatcg ccaatttctccacc    | ggtggagaaattgg cgatcgtatagcagcatt tggaccttttc     |
| M15              | AA 773-778       | gaaggaaccaa aatgctgctatac gatcg ttccatggctg       | ccagaccatggaa cgatcgtatagcagcatt atttggtcttc      |
| M16              | AA 778-783       | ccaatttccacca aatgctgctatac gatcg accctaaccgtgatg | catcacggtagggt cgatcgtatagcagcatt tgggtgagaaattgg |

## Supplemental Table 2: Mutagenesis primers for TβRIII alanine mutants

| <i>Mutation:</i> | <i>Forward Primer Sequence:</i> | <i>Reverse Primer Sequence:</i> |
|------------------|---------------------------------|---------------------------------|
| s689a            | gaagcgattc gcc ttgtcttcaag      | cttgaagacaaa ggc gaatcgcttc     |
| f690a            | gcgattcagc gcc gtctcaagcc       | ggcttgaagac ggc gctgaatgc       |
| v691a            | gattcagctt gcc ttcaagcctg       | caggcttga ggc aaagctgaatc       |
| f692a            | cagcttgtc gcc aagcctgtcttc      | gaagacaggctt ggc gacaaagctg     |
| k693a            | gcttgtcttc gcc cctgtcttcaac     | gttgaagacagg ggc gaagacaaaagc   |
| p694a            | cttgtcttcaag gcc gtcttcaacacc   | ggtgttgaagac ggc ctgaagacaaaag  |
| v695a            | cttcaagcct gcc ttcaacacc        | ggtgttga ggc aggcttgaag         |
| f696a            | caagcctgtc gcc aacacctcac       | gtgagggtt ggc gacaggcttg        |
| n697a            | gcctgtcttc gcc acctcactgctc     | gagcagtgagg ggc gaagacaggc      |
| t698a            | ctgtcttcaac gcc tctactgctc      | gagcagtg ggc gttgaagacag        |
| s699a            | gtcttcaacacc gcc ctgctcttctac   | gtagaaagagcag ggc ggtgttgaagac  |
| l700a            | cttcaacacctca gcc ctcttctacag   | ctgtagaagag ggc tgagggttgaag    |
| i737a            | ctggacgcctcg gcc atctgggcatg    | catggcccagat ggc cgaggcgtccag   |
| i738a            | gacgcctcgata gcc tgggcatgatg    | catcatggccc ggc tctcaggcgtc     |
| w739a            | gcctcgataatc gcc gccatgatcgag   | ctgcatcatggc ggc gattatcgaggc   |
| m741a            | gataatctgggcc gcc atgcagaataag  | cttattctgcat ggc ggcccagattatc  |
| m742a            | ctgggcatg gcc cagaataagaag      | cttcttattctg ggc catggcccag     |
| t749a            | gaagacgttc gcc aagcccctg        | gcaaggggctt ggc gaacgtcttc      |
| k750a            | gaagacgttacc gcc cccctgtgtg     | cacagcaagggg ggc ggtgaacgtcttc  |
| p751a            | cgttaccaag gcc ctgtctgtgatc     | gatcacagcaag ggc ctgggtgaacg    |
| l752a            | accaagccc gcc gctgtgatccac      | gtggatcacagc ggc gggctgtgtg     |
| v754a            | caagcccctgct gcc atccaccatgaag  | cttcatggtgat ggc agcaaggggcttg  |

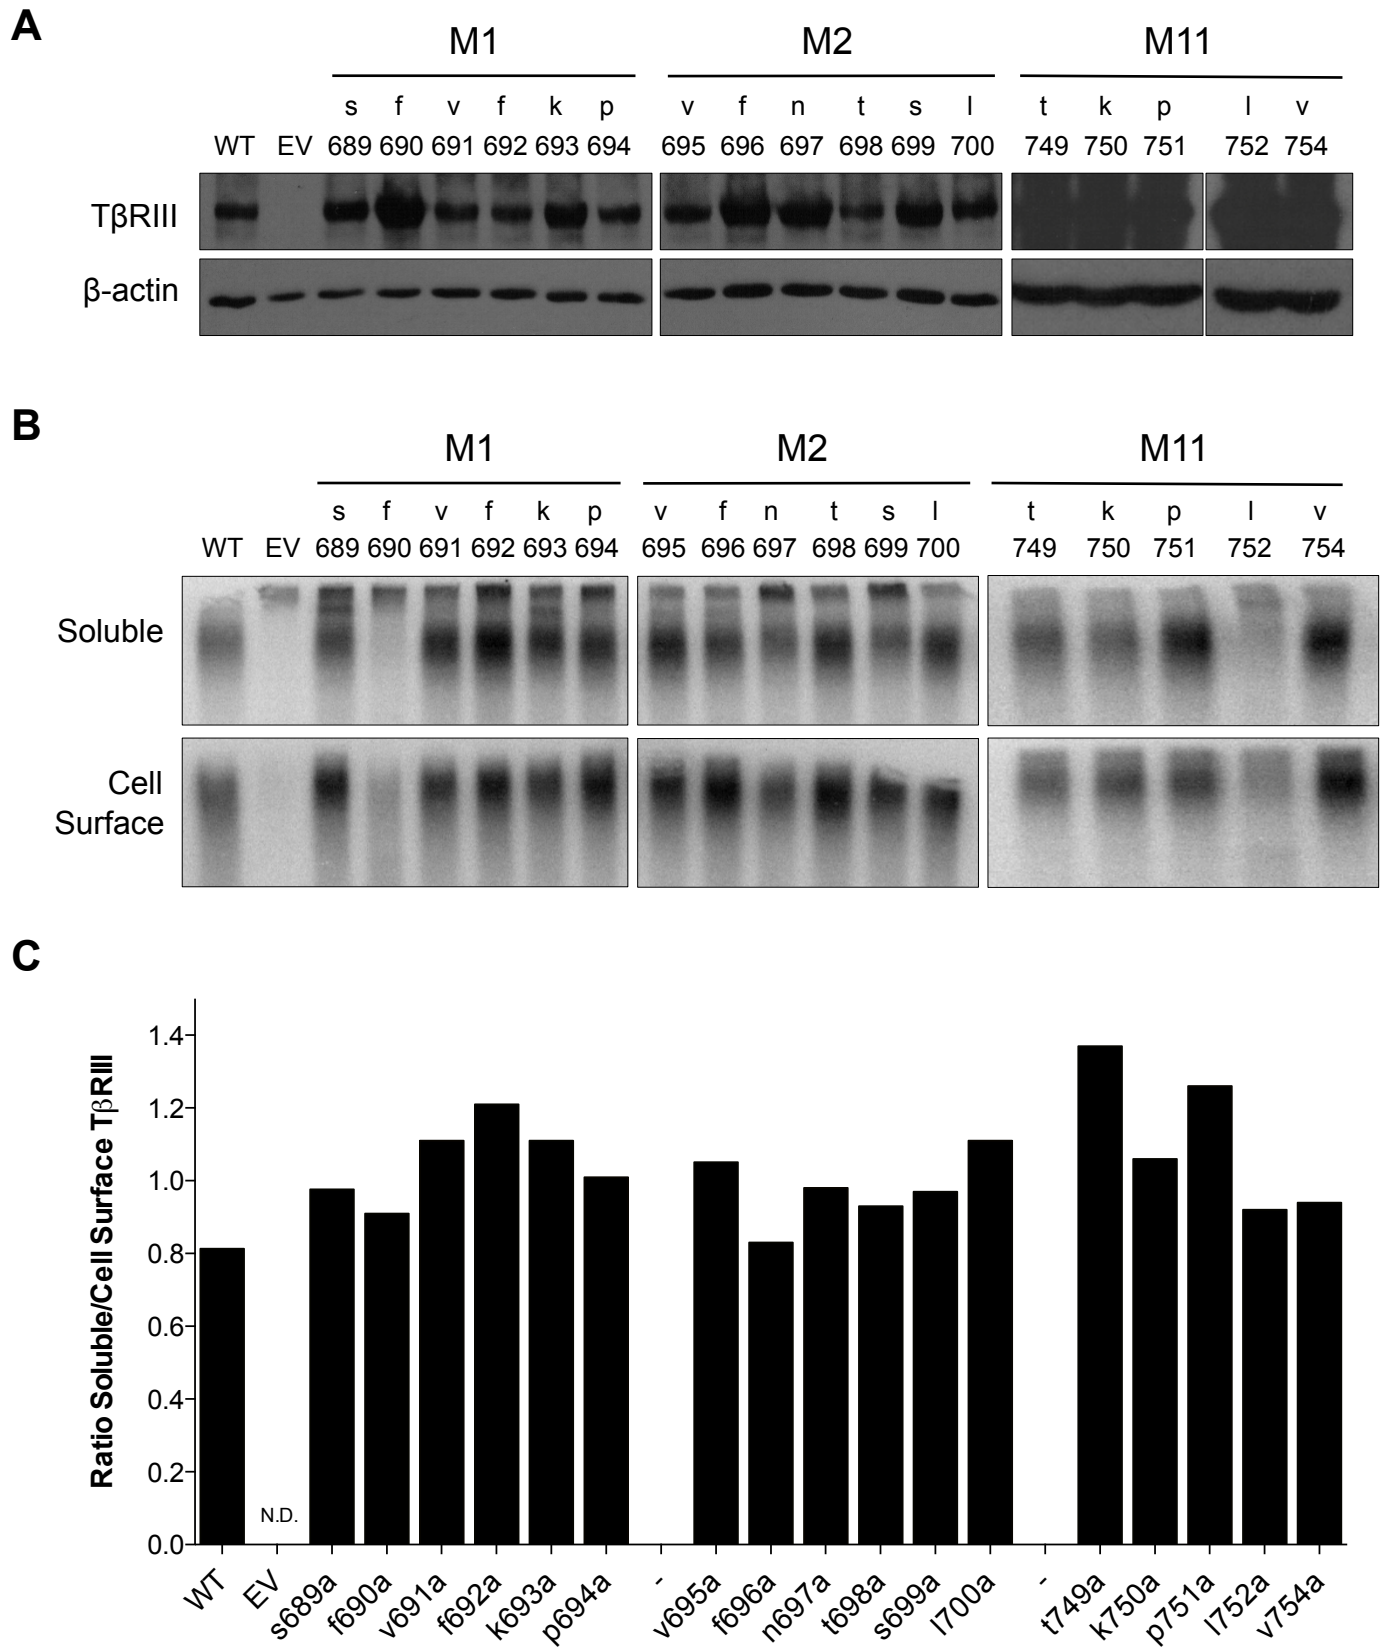

**Supplemental Figure 1: No single point mutations within M1, M2 or M11 significantly altered TβRIII ectodomain shedding.** (A) Western blot of transiently transfected WT-TβRIII or alanine mutants in COS7 cells. β-actin was used as a loading control. (B) Binding and crosslinking of transiently transfected WT-TβRIII or alanine mutants in COS7 cells. 24 h after transfection media was changed to full serum media and allowed to condition overnight. Following <sup>125</sup>I-TGF-β1 binding and crosslinking, lysates and conditioned media were immunoprecipitated with an antibody against HA. (C) Quantification of (B). Data shown as densitometry of soluble TβRIII/cell surface TβRIII. Representative image from 2 independent experiments.

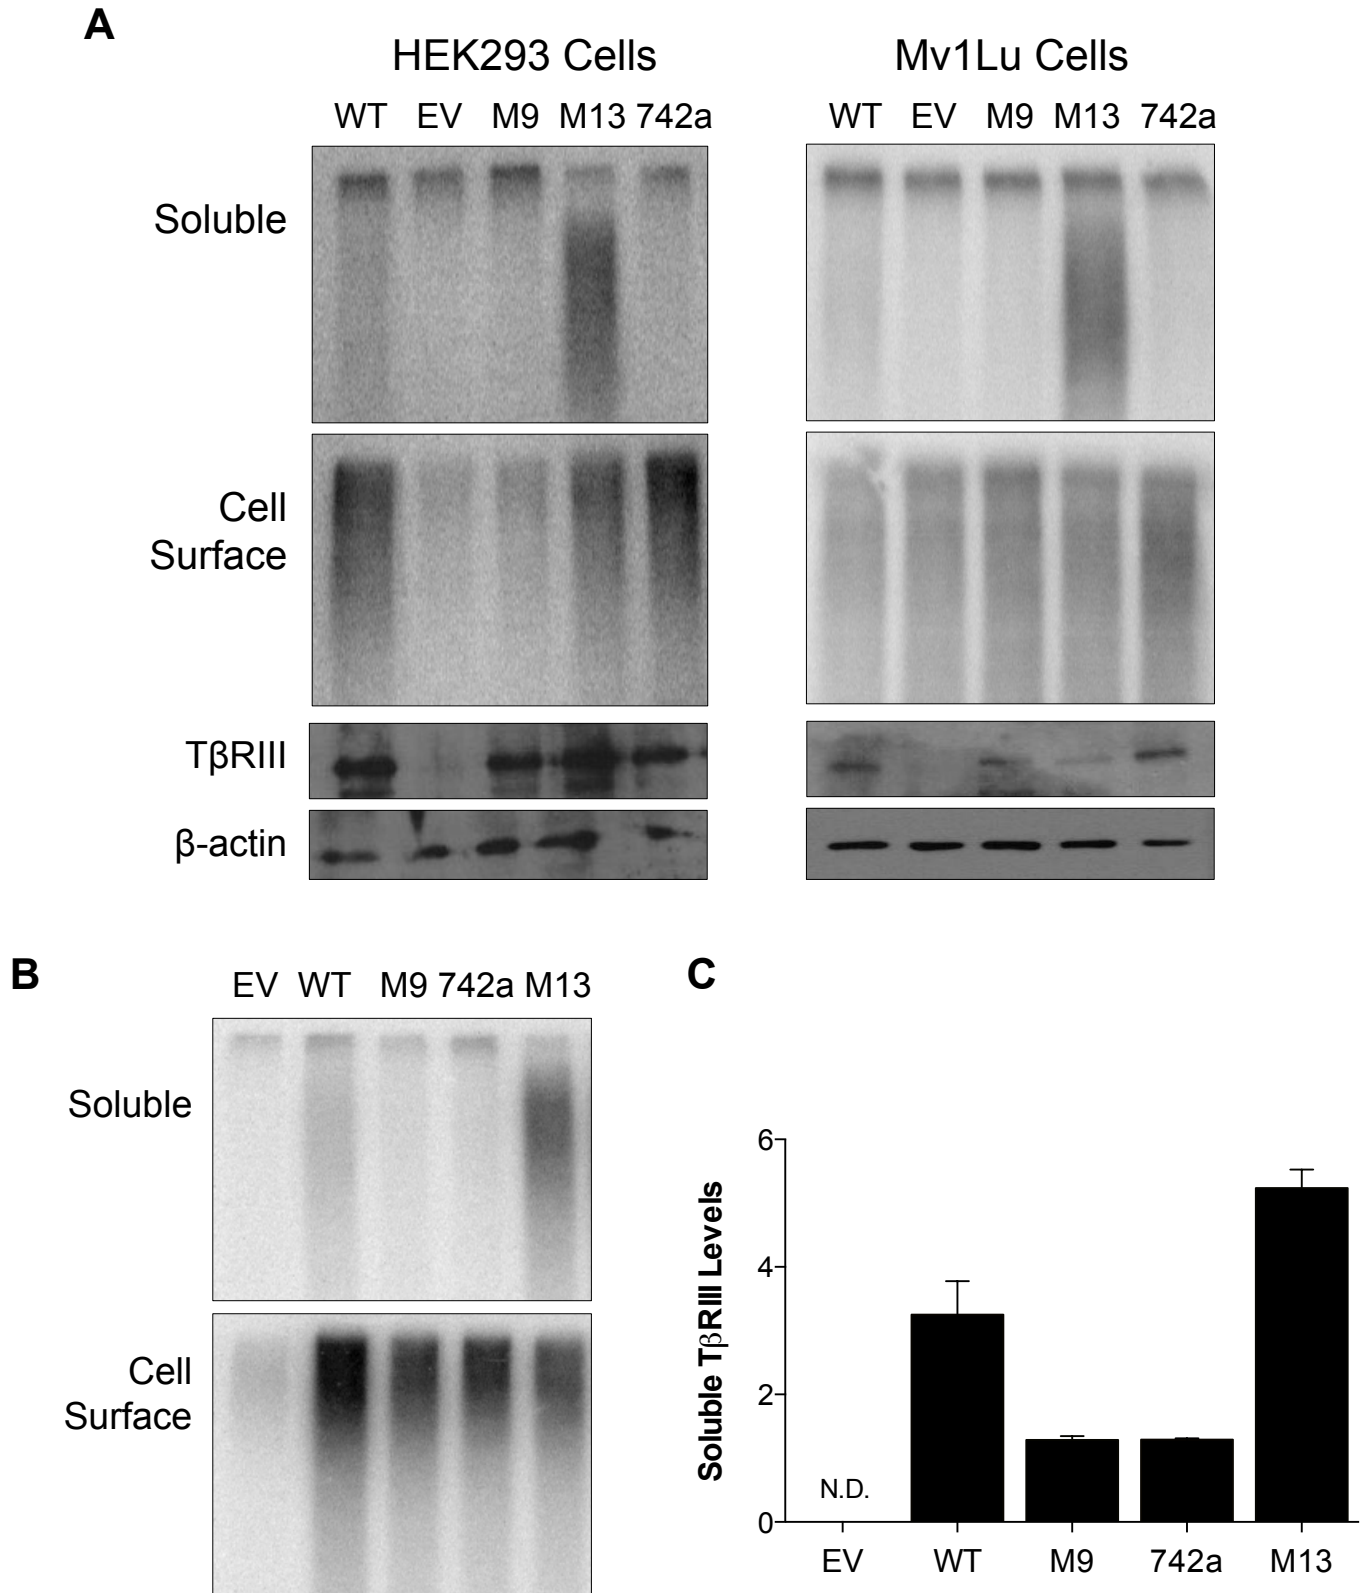

**Supplemental Figure 2: Alterations in TβRIII ectodomain shedding in shedding mutants is maintained in multiple cell lines.** (A) Binding and crosslinking of HEK293 and Mv1Lu cells. Cells were transiently transfected with EV, WT-TβRIII or shedding mutants and 24 h later media was replaced and allowed to condition for 20 h. Following <sup>125</sup>I-TGF-β1 binding and crosslinking, lysates and conditioned media were immunoprecipitated with an antibody against TβRIII. TβRIII and β-actin western blots shown as loading controls. Representative images from 2 independent experiments. (B) Binding and crosslinking of final shedding mutants in COS7 cells, performed as in (A). Representative images from 2 independent experiments. (C) ELISA data from media conditioned from transiently transfected COS7 cells for 20 h. Data from 3 independent experiments are shown as levels of soluble TβRIII in the conditioned media normalized to β-actin loading controls from the corresponding cell lysates.

**A**

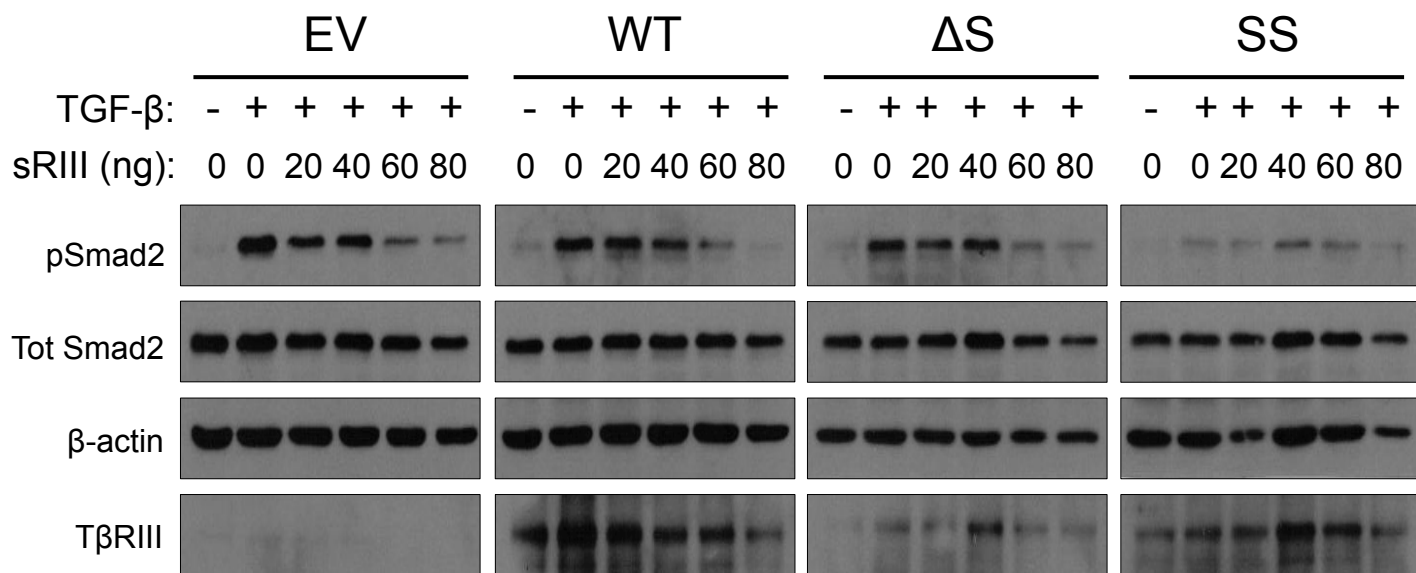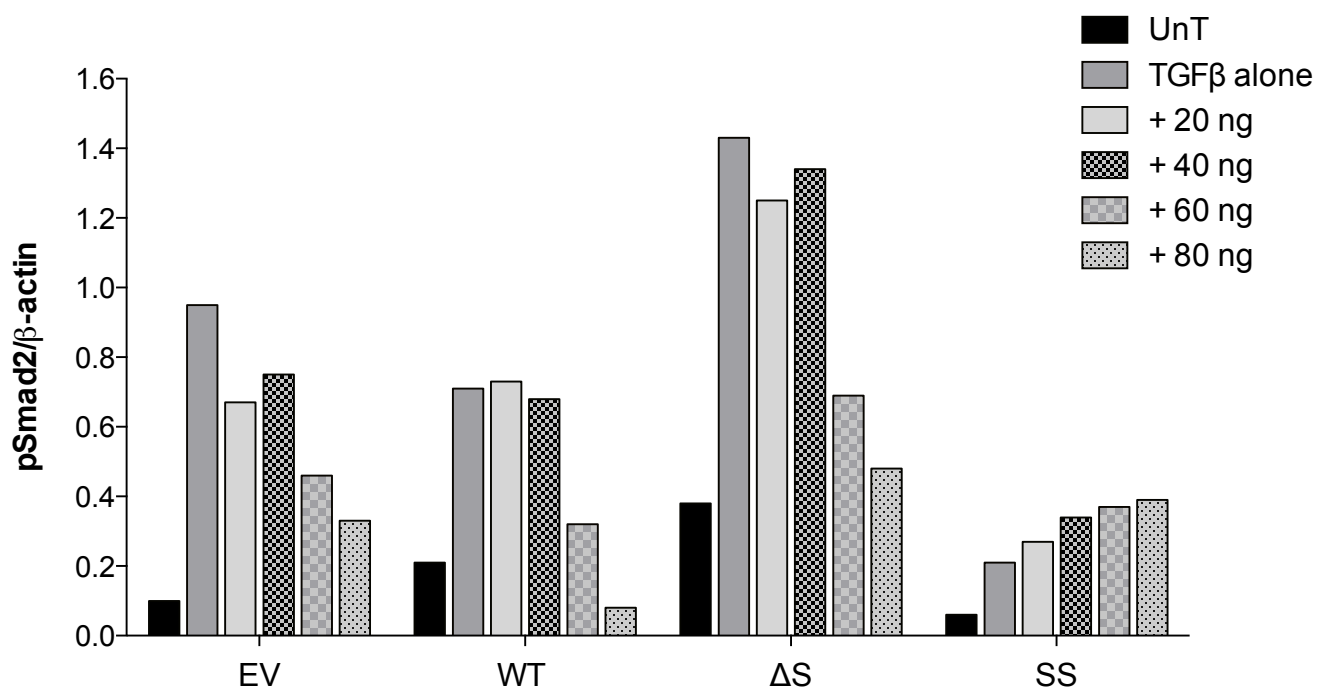

**Supplemental Figure 3: TGF- $\beta$  signaling is reduced by exogenous soluble T $\beta$ R111.** (A) Lentiviral stable MDA-MB-231 cell lines were plated in full serum media and allowed to condition for 20 h before treatment with 50 pM TGF- $\beta$ 1 and indicated amounts of exogenous soluble T $\beta$ R111 for 30 minutes. Western blot analysis performed with indicated antibodies. T $\beta$ R111 and  $\beta$ -actin western blots shown as loading controls. Representative image from 2 independent experiments. Densitometric analysis of pSmad2/ $\beta$ -actin control shown below.

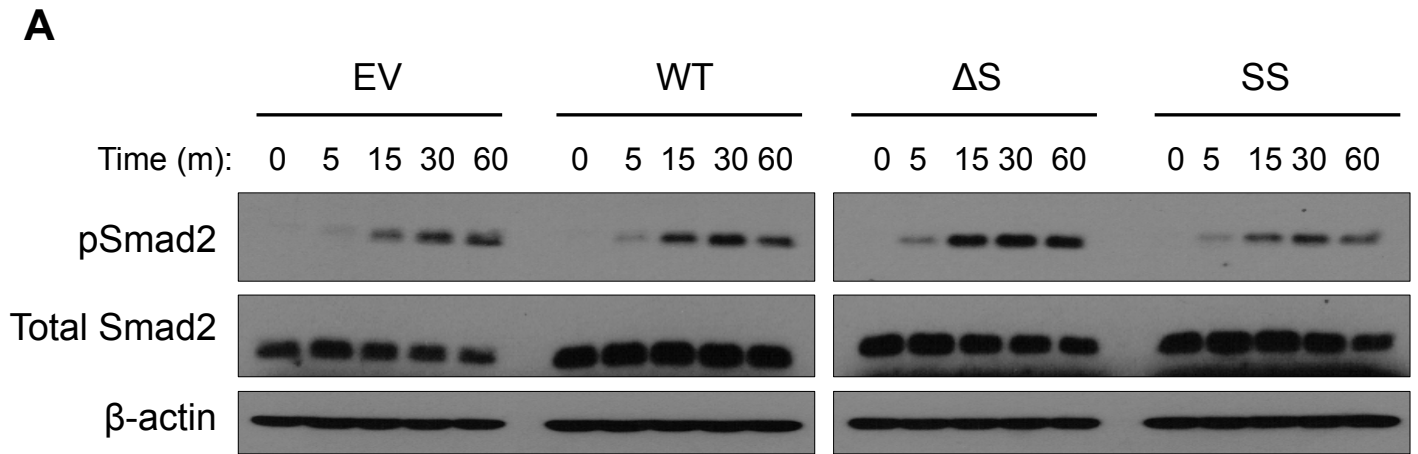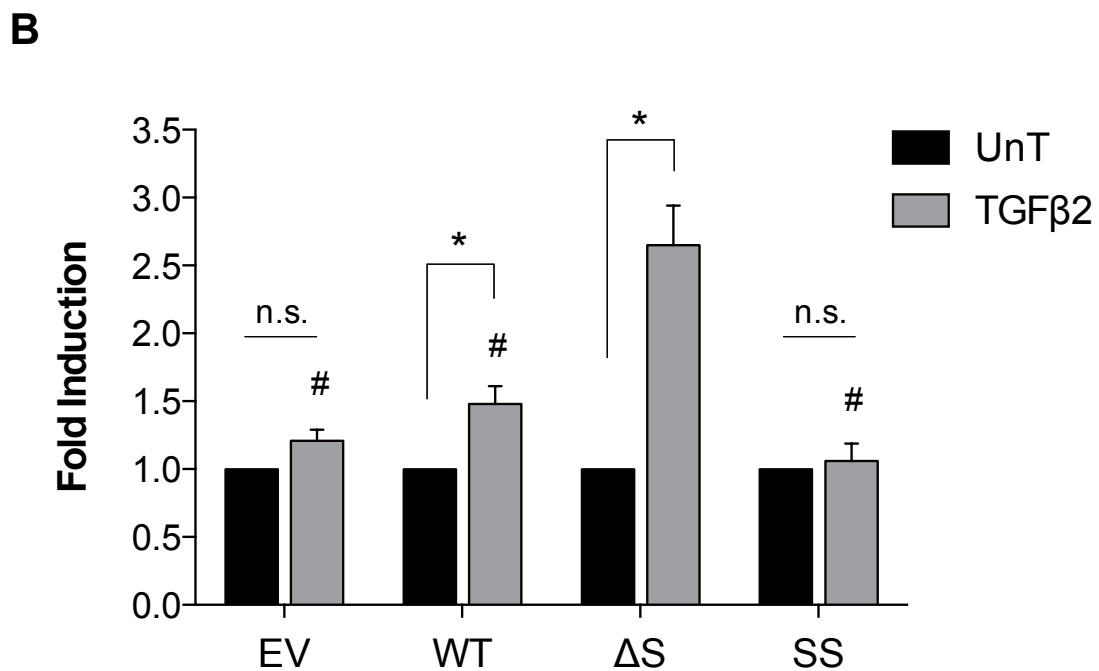

**Supplemental Figure 4: WT-TβRIII and ΔS-TβRIII sensitize MDA-MB-231 cells to TGF-β2.** (A) Lentiviral stable MDA-MB-231 cell lines were plated in full serum media and allowed to condition for 20 h before treatment with 50 pM TGF-β2 for the indicated time periods. Western blot analysis performed with indicated antibodies. Representative images from 2 independent experiments. (B) Stable MDA-MB-231 cell lines were transfected with a pE2.1 responsive luciferase construct and a renilla construct. The following day cells were treated with media that had been pre-conditioned from the corresponding cell line for 24 h and 50 pM TGF-β2. Cells were treated for 24 h. Results from 4 independent experiments are shown as pE2.1/renilla activity, and normalized to ligand untreated condition of each cell line. \* One-sample t-test  $p < 0.05$  relative to UnT. # Two-tailed t-test  $p < 0.05$  relative to ΔS + TGF-β2.

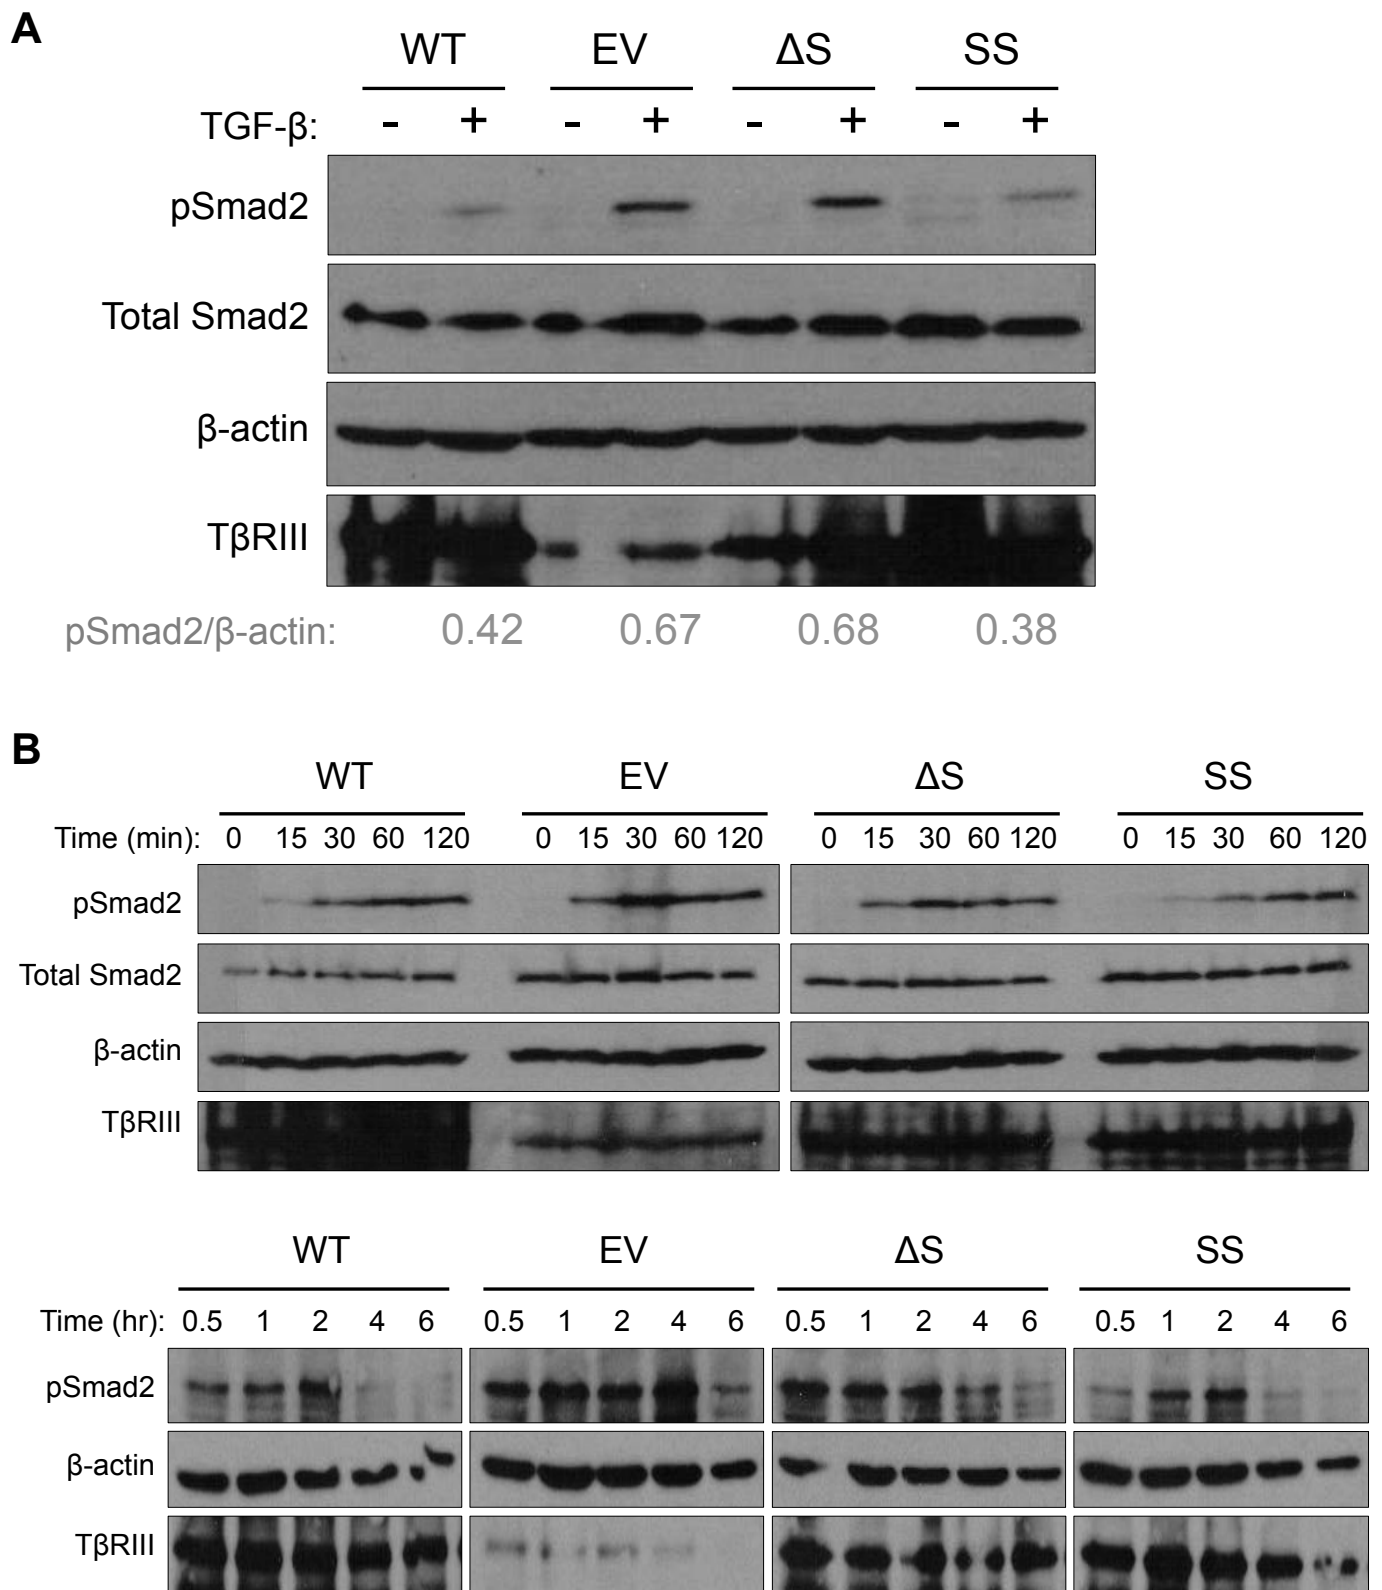

**Supplemental Figure 5:** *T $\beta$ RIII* ectodomain shedding regulates the kinetics and magnitude of TGF- $\beta$  signaling in HEK293 cells. HEK293 cells were transiently transfected with EV, WT-T $\beta$ RIII or shedding mutants. Following overnight serum starvation, cells were treated with (A) 50 pM TGF- $\beta$ 1 for 30 minutes or (B) 50 pM TGF- $\beta$ 1 for indicated time period. Western blot analysis performed with indicated antibodies. T $\beta$ RIII and  $\beta$ -actin western blots shown as loading controls. Representative images from 3 independent experiments shown.

**A**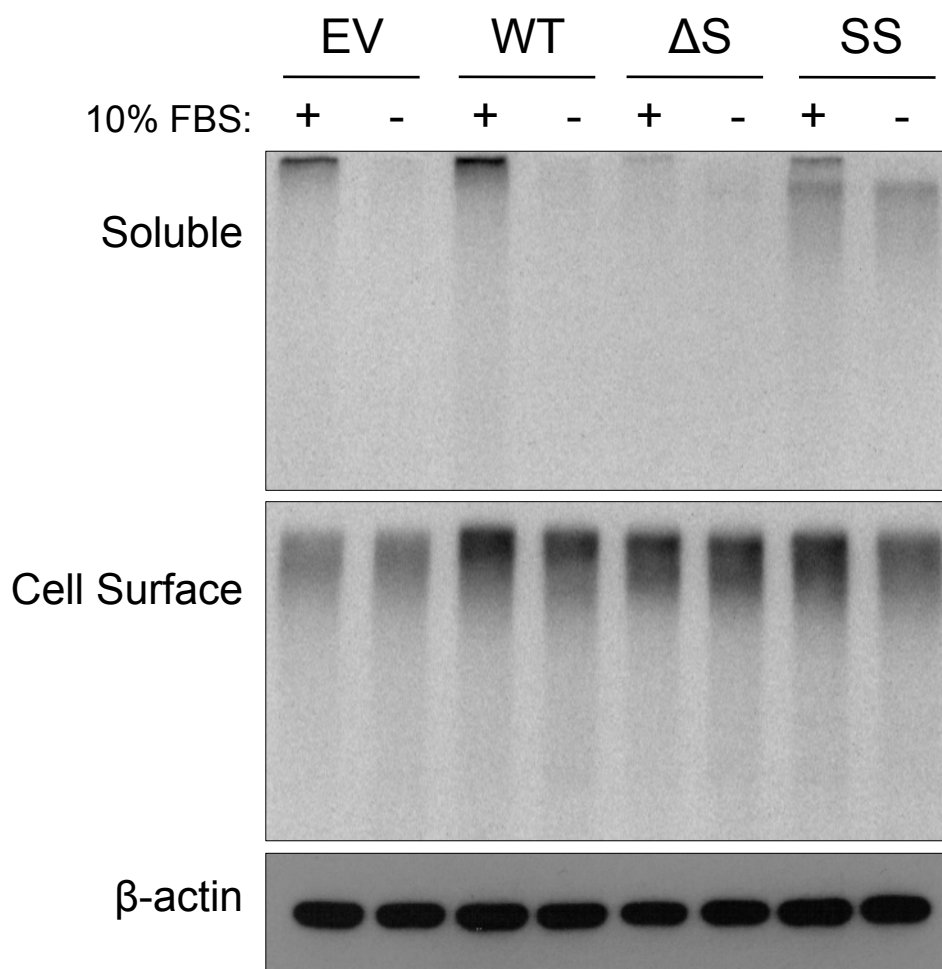**B**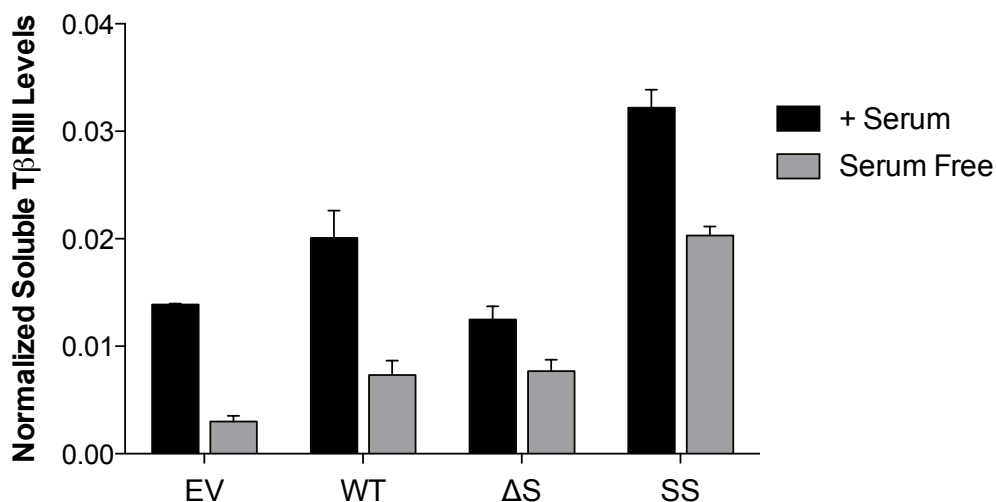

**Supplemental Figure 6:** *TβRIII* ectodomain shedding is affected by the presence of serum in MDA-MB-231 cells. (A) Binding and crosslinking of lentiviral stable MDA-MB-231 cell lines expressing either EV, WT- $T\beta RIII$  or the shedding mutants. Cells were plated and the following day media was changed to either full serum media (10% FBS) or serum-free media and allowed to condition for 24 h. Following  $^{125}I$ -TGF- $\beta 1$  binding and crosslinking lysates and conditioned media were immunoprecipitated with an antibody against  $T\beta RIII$ .  $\beta$ -actin western blot shown as a loading control. Representative images from 2 independent experiments shown. (B) ELISA data from media conditioned from lentiviral stable cell lines for 24 h in the absence or presence of 10% FBS. Data from 3 independent experiments are shown as levels of soluble  $T\beta RIII$  in the conditioned media normalized to  $\beta$ -actin loading controls from the corresponding cell lysates. Two-way ANOVA for cell line and treatment  $p < 0.001$ .



**A**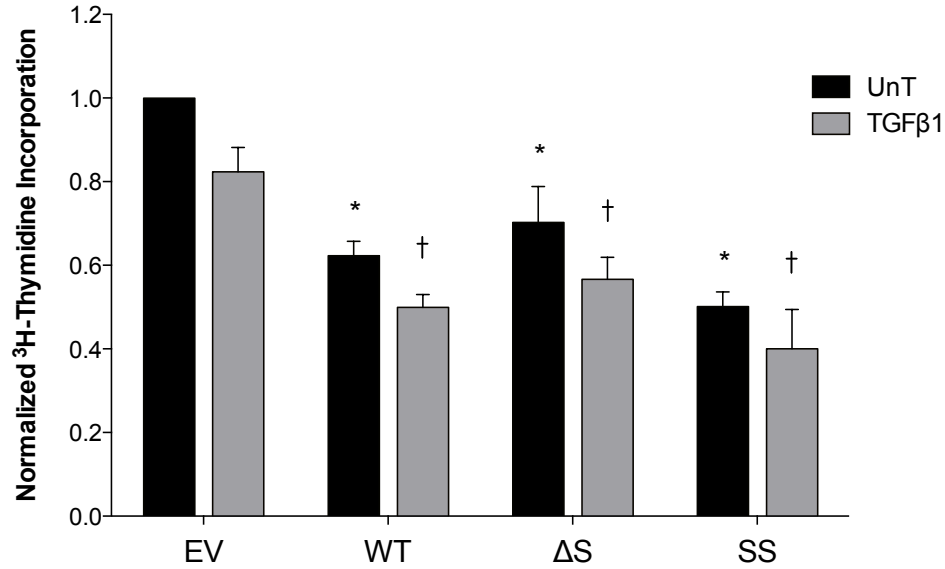

**Supplemental Figure 7: Effects of *TβRIII* and shedding mutants on proliferation at 24 hours.** (A) MDA-MB-231 lentiviral stable cell lines expressing either EV, WT-*TβRIII* or the shedding mutants were plated in media pre-conditioned for 24 h from corresponding cells in 96 well plates in triplicate in the absence or presence of 50 pM TGF-β1. 24 hours later proliferation was determined via <sup>3</sup>H-Thymidine incorporation. Data from 4 independent experiments are shown as CPM normalized to EV UnT. Two-way ANOVA for cell line  $p < 0.002$ . \* One-sample  $t$ -test  $p < 0.05$  relative to EV UnT. † Two-tailed  $t$ -test  $p < 0.05$  relative to EV + TGF-β1.

**A**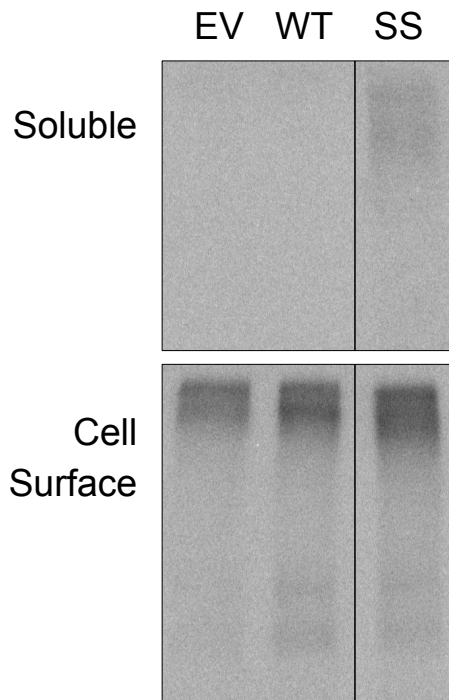**B**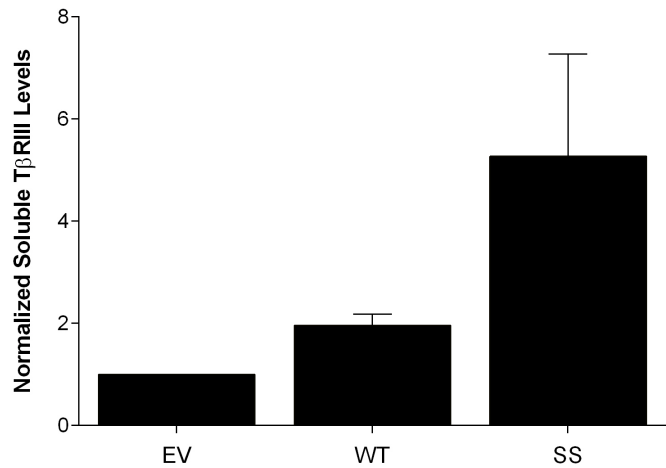

**Supplemental Figure 8: Soluble *TβRIII* production is increased by the SS-*TβRIII* mutant in MDA-MB-231-4175 cells.** (A) MDA-MB-231-4175 lentiviral stable cell lines expressing either EV, WT-*TβRIII* or the Super-Shedding *TβRIII* mutant were plated and 24 h later media was replaced and allowed to condition for 20 h. Following <sup>125</sup>I-TGF-β1 binding and crosslinking, lysates and conditioned media were immunoprecipitated with an antibody against *TβRIII*. Representative images from 2 independent experiments. (B) ELISA data from media conditioned for 20 h. Data from 2 independent experiments are shown as levels of soluble *TβRIII* in the conditioned media normalized to β-actin loading controls from the corresponding cell lysates.
